# Supplementary material for: Identification of a Novel Pleiotropic Transcriptional Regulator Involved in Sporulation and Secondary Metabolism Production in Chaetomium globosum
Source: MDPI journal article supplement (doi:10.3390/ijms232314849), 2022-11-27
Supplement: s1 [file s1]

# **Identification of a novel pleiotropic transcriptional regulator involved in sporulation and secondary metabolism production in *Chaetomium globosum***

**Shanshan Zhao, Kai Zhang, Congyu Lin, Ming Cheng, Jinzhu, Song, Xin Ru ,**

**Zhengran Wang, Wan Wang, Qian Yang\***

School of Life Science and Technology, Harbin Institute of Technology, Harbin 150080,  
China

**\* Correspondence:** yangq@hit.edu.cn; Tel./fax: +86-451-86402652

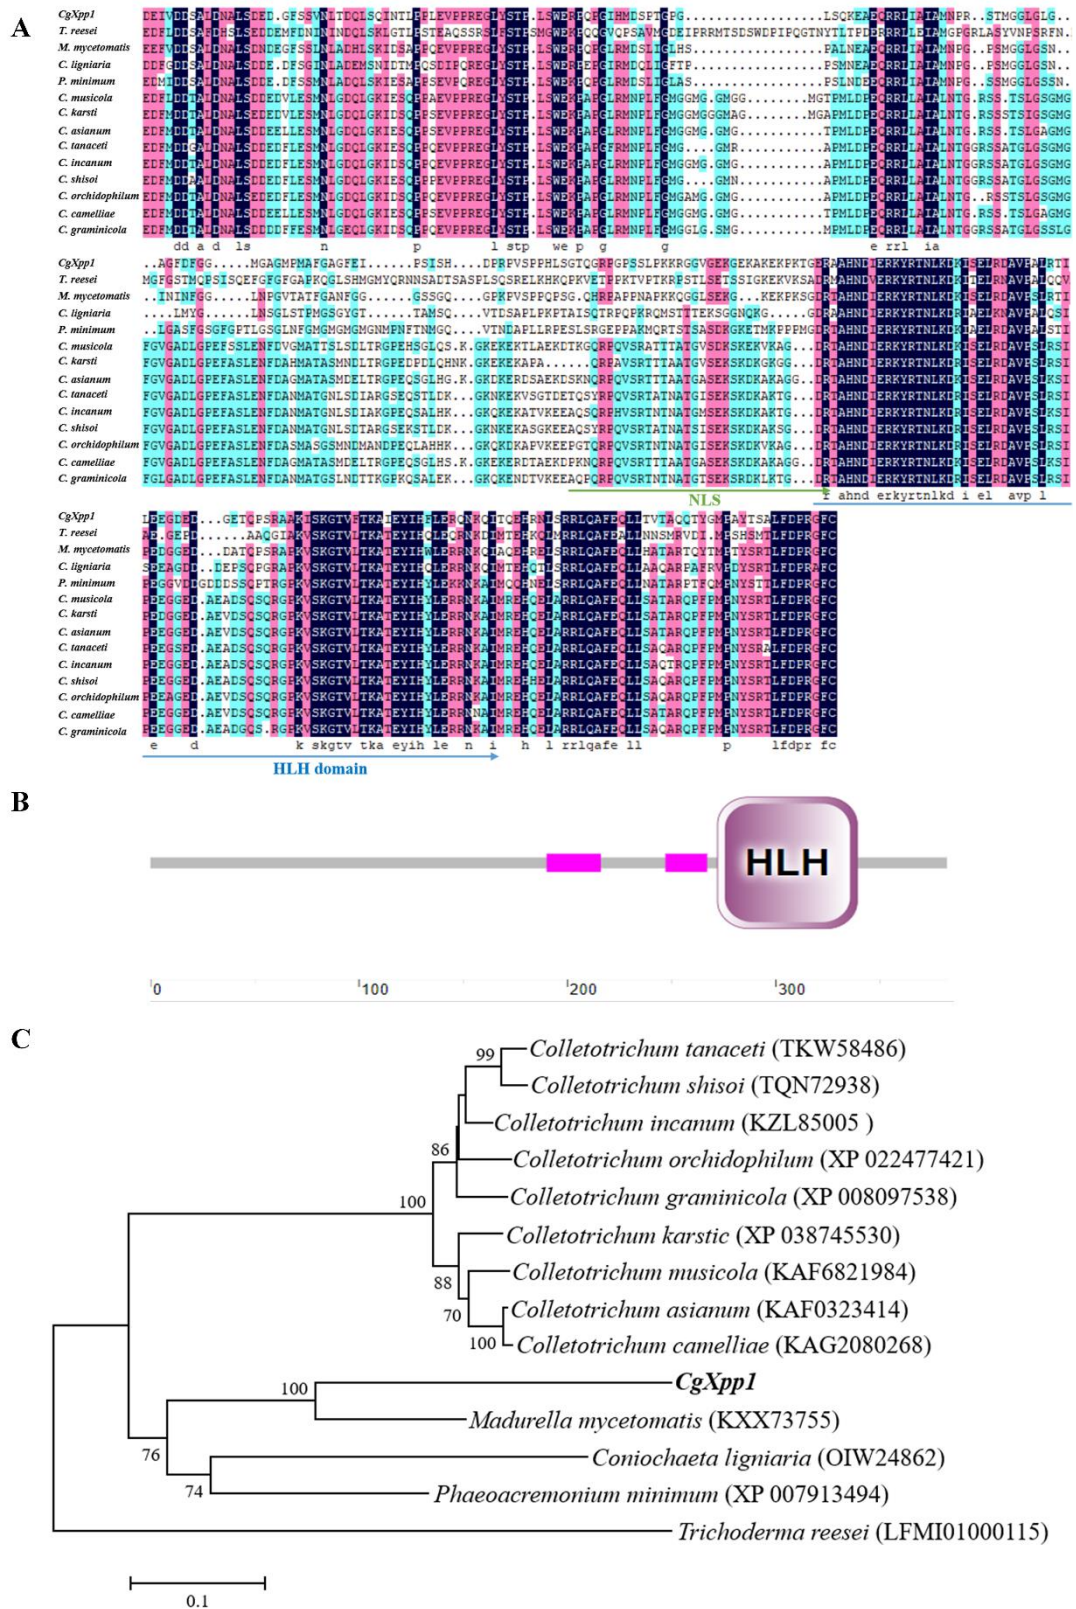

**Figure S1.** Bioinformatic analysis of CgXpp1 in *C. globosum* W7. (A) Multiple Sequence Alignment of CgXpp1 orthologs from similarity species, which obtained from the GenBank databases, performed by using DNAMAN software. The predicted putative nuclear localization

signal (NLS) and helix-loop-helix (HLH) domains are presented by green and blue lines respectively;

(B) The structure of CgXpp1 regulator on evaluated by the online Simple Modular Architecture Research Tool (SMART) (available online: <http://smart.embl-heidelberg.de/>). Bright purple rectangle: regions of low compositional complexity; HLH region: helix-loop-helix (HLH) domain;

(C) Neighbor-joining tree showing the phylogenetic position of isolate *C. globosum* W7 and its homologs based on amino acid sequences. CgXpp1 of *C. globosum* W7 is highlighted in bold. The Clustal X 1.83 program was used for performing sequence alignment. Only bootstrap values above 50 % (percentages of 1000 replications) are indicated. Bar, 0.1 amino acid substitutions per site.

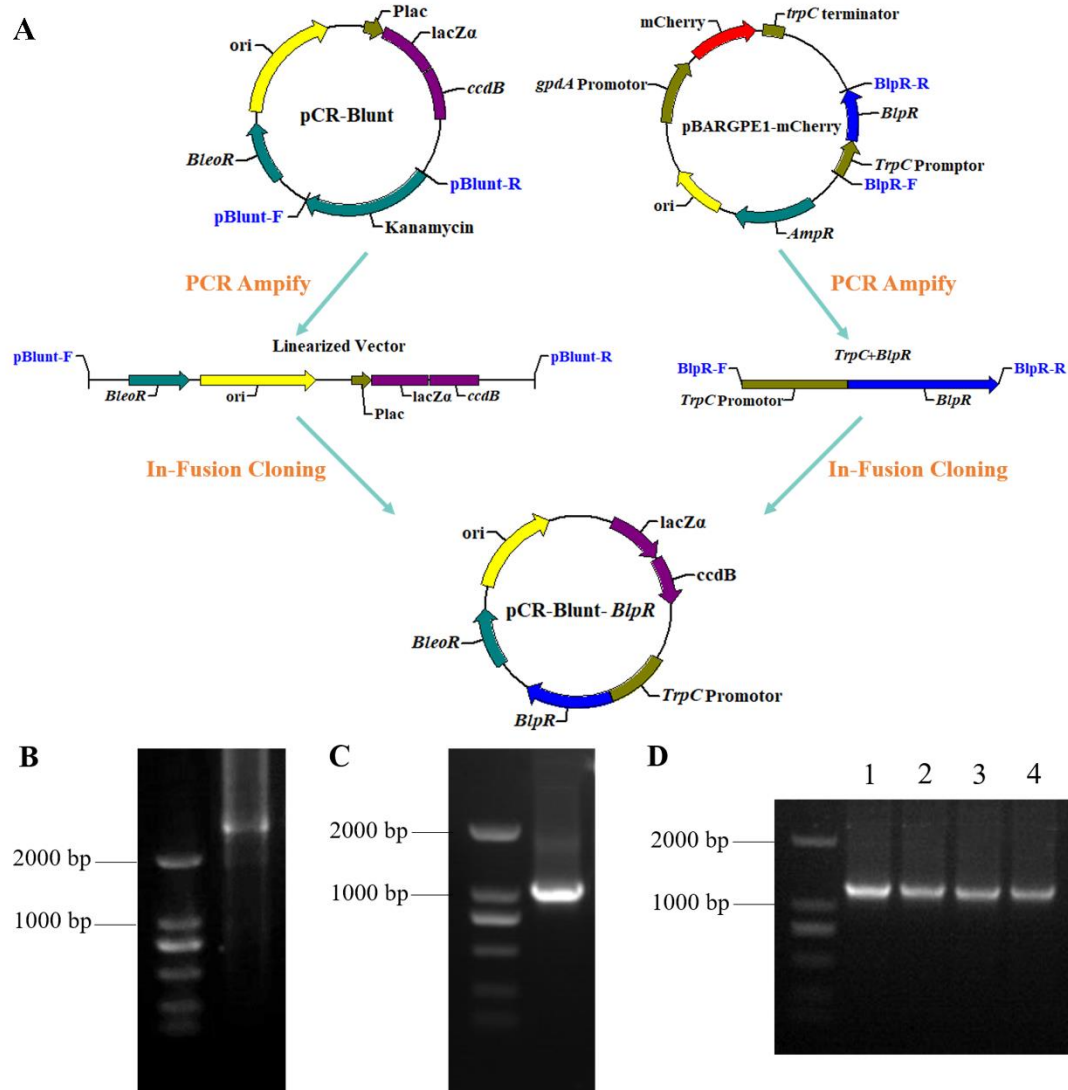

**Figure S2.** Schematic for gene knockout backbone vector pCR-Blunt-*BlpR*. (A) Construction diagram of carrier pCR-Blunt-*BlpR*. Bleomycin (*BleoR*), bialaphos (*BlpR*) resistance gene and a *ccdB* lethality gene were employed as the selectable marker; (B) The linearized carrier of pCR-Blunt obtained by PCR amplifying; (C) Bialaphos resistance gene (*BlpR*), which was employed to replace the *KanR* gene in the pCR-Blunt plasmid, was amplified from the vector pBARGPE1-mCherry using the *BlpR*-F and *BlpR*-R primers pairs; (D) Diagnostic PCR of all the mutants. 1-4: represented different transformants.

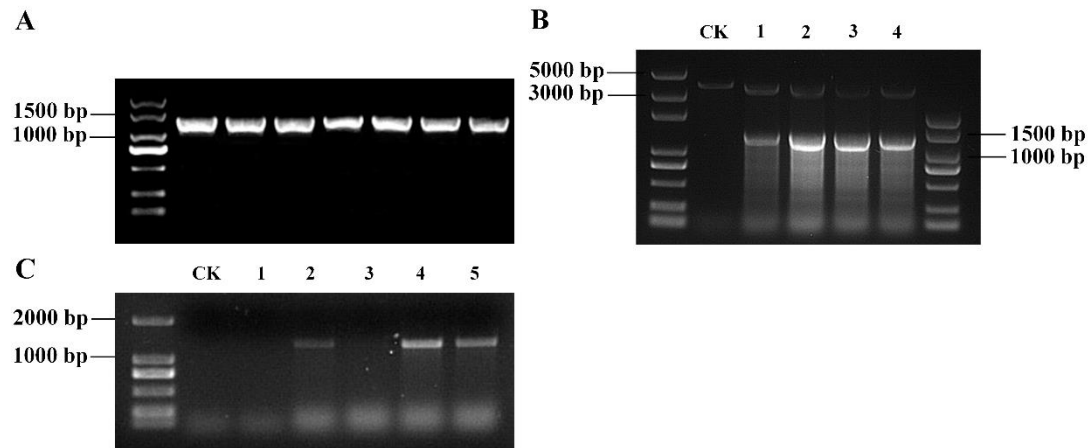

**Figure S3.** Construction the complementation plasmid of *CgXpp1*. (A) The amplified result of the unbroken *CgXpp1* by using as primers oligonucleotides *CgXpp1*-ComF and *CgXpp1*-ComF; (B) *CgXpp1*-Com double enzyme digestion verification. CK: pCR-Blunt-*BlpR* digested with EcoRV and NotI. 1-4: represented various mutants that formed a linearized fragment of empty carrier (3639 bp) and an inserted sequence (1290 bp) after digesting by the same restriction endonuclease; (C) Diagnostic PCR of all the *CgXpp1* complementation mutants. CK: Original species *CgXpp1*-N14, which has been verified to completely knockout the target gene.

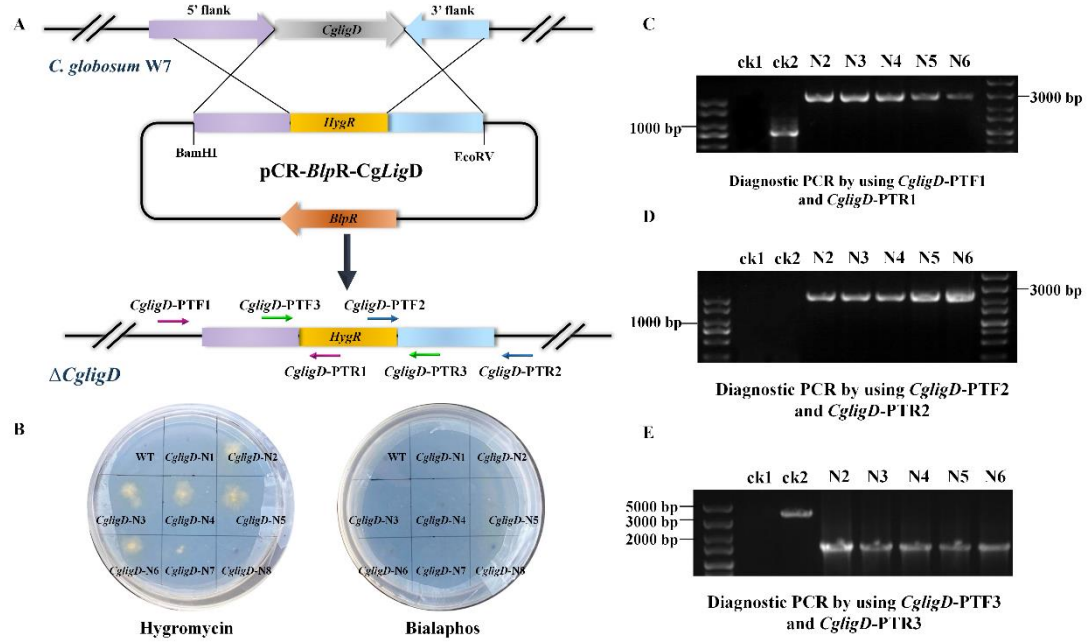

**Figure S4.** Construction and validation of the *CgligD* disruption mutants. **(A)** The strategy for knocking-out the *CgligD* gene in the wild-type species via homologous recombination method; **(B)** The double antibiotic verification results of *CgligD* genetic derivatives derived from *C. globosum* W7; **(C)-(E)** Verification the *CgligD* disruption mutants at DNA level by diagnostic PCR. ck1, water control; ck2, wild-type strain *C. globosum* W7; N2-N6, the *CgligD* gene deletant named *CgligD*-N2–*CgligD*-N6.

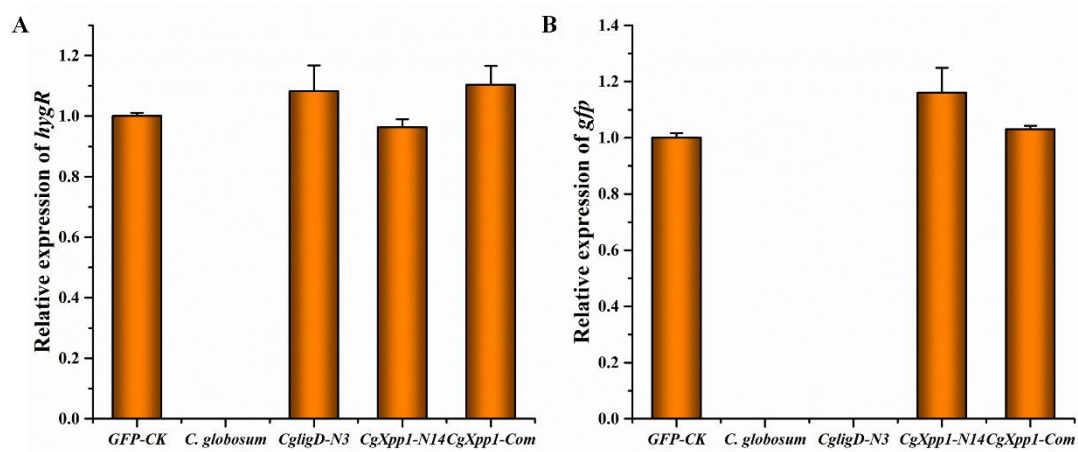

**Figure S5.** Relative expressions of hygromycin resistance gene (*hygR*) and green fluorescent reporter gene (*gfp*) in GFP-CK (parental strain carrying empty vector pBARGPE1-EGFP), *C. globosum*, *CgligD*-N3 (*CgligD* deletion mutant), *CgXpp1*-N14 (*CgXpp1* disruption mutant) and *CgXpp1*-Com (*CgXpp1* complemented derivative) at 9 days of incubation in PDA medium at 28 °C. Data were averaged using triplicate measurements.

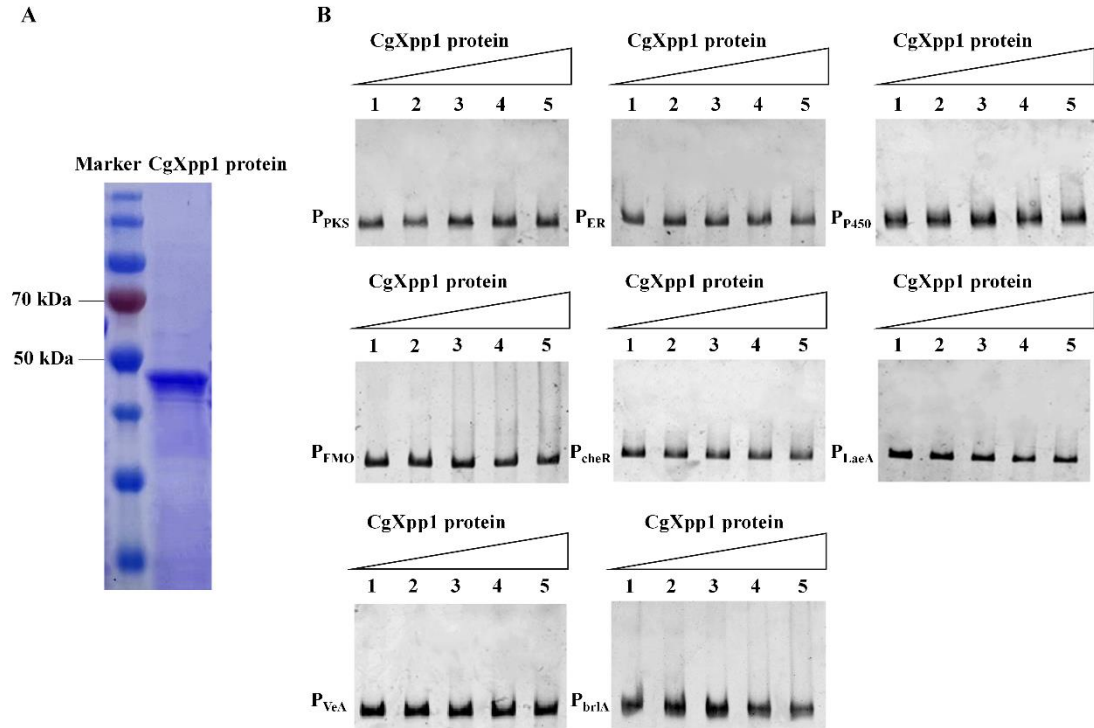

**Figure S6.** EMSAs for detecting the binding ability of purified CgXpp1 protein to the promoter regions of *CgPKS*, *CgER*, *CgP450*, *CgFMO*, *CgcheR*, *CgLaeA*, *CgVeA* and *brlA*. (A) Validation of the purified CgXpp1 protein by SDS-PAGE; (B) EMSA of the CgXpp1 protein and detected gene probes. Lanes 1–5: 0, 0.4, 0.8, 1.2 and 1.6  $\mu\text{g}$  of CgXpp1, respectively.



**Table S1.** Primers designed for *C. globosum* W7 in this work.

| Primer              | Sequence                                                                         |
|---------------------|----------------------------------------------------------------------------------|
| <i>CgXpp1</i> -ALF  | 5'- GCAGATATCCATCACACTG <u>GCGGCCGCT</u> TGCAAGCAGACCGTTGAGCTCC -3'<br>(NotI)    |
| <i>CgXpp1</i> -ALR  | 5'- TGCGTCCGTCCGTCTCTCCGCATGCGGCTGTGAGTCCGGTAAGGGGG-3'                           |
| EGFP-F              | 5'- GCATGCGGAGAGACGGACGGA -3'                                                    |
| EGFP-R              | 5'- GCAAGTAACTGGGTGGCGAGATGCGTTACTTGTACAGCTCGTCCATGCCG -3'                       |
| <i>CgXpp1</i> -ARF  | 5'- CGCATCTCGCCACCCAGTTACTTGCTA -3'                                              |
| <i>CgXpp1</i> -ARR  | 5'-AGGTGTAAACCTTAAACTGCCG <u>TACGTACT</u> CCAACCTCTCCCCACAAACATAA<br>-3' (SnaBI) |
| <i>BlpR</i> -F      | 5'- ACAGGATGAGGATCGTTTCGCTCGACAGAAGATGATATTGAAGGA -3'                            |
| <i>BlpR</i> -R      | 5'- GAAATTGTAAGCGTTAATAATTCAGATCTCGGTGACGGGC -3'                                 |
| pBlunt-F            | 5'- ATTATTAACGCTTACAATTTCCTGATGCGGTATT -3'                                       |
| pBlunt-R            | 5'- GCGAAACGATCCTCATCTGTCTCTTG -3'                                               |
| pKan-TF             | 5'- AAAACGCAAGCGCAAAGAGAA -3'                                                    |
| pKan-TR             | 5'- TTAGAAAAATAAAACAAATAGGGGTT -3'                                               |
| <i>CgXpp1</i> -ComF | 5'- AATTCAGGCCTGAATTCTGCA <u>GATATC</u> ATGTCCCATGACGTCTCTTCAA -3'<br>(EcoRV)    |
| <i>CgXpp1</i> -ComR | 5'- CTAGATGCATGCTCGA <u>GCGGCCGC</u> CTAACAGAACCCTCTTGGATCGAAAA -3'<br>(NotI)    |
| TXF1                | 5'- CAATACGCAAACCGCCTCTC -3'                                                     |
| TXR1                | 5'- GACGGCAGTTGAAATGGAATAT -3'                                                   |
| TXF2                | 5'- TTTTGTCTTGGTTTGGCTTTG -3'                                                    |
| TXR2                | 5'- TCAGAGCTTGATCCCCCTGCG -3'                                                    |
| <i>CgIigD</i> -PTF1 | 5'- GGTATGTCACCCTTCTTTGGC -3'                                                    |
| <i>CgIigD</i> -PTR1 | 5'- GTTCCTGTCTGCTAATAAGAGTCA -3'                                                 |
| <i>CgIigD</i> -PTF2 | 5'- CCATTCGGACCGCAAGGA -3'                                                       |
| <i>CgIigD</i> -PTR2 | 5'- TGGTG TAGAGCTGGGTGAGGA -3'                                                   |
| <i>CgIigD</i> -PTF3 | 5'- CTCACATTCACAGCCCACCAG -3'                                                    |
| <i>CgIigD</i> -PTR3 | 5'- GCCATACGCCTTTTGACACC -3'                                                     |
| <i>CgXpp1</i> -PTF1 | 5'- TCAACTTACTTACGGCTCCCCCA -3'                                                  |
| <i>CgXpp1</i> -PTR1 | 5'- GAGGGGCACACCAGCCTTTC -3'                                                     |
| <i>CgXpp1</i> -PTF2 | 5'- CCGACCACTACCAGCAGAACAC -3'                                                   |
| <i>CgXpp1</i> -PTR2 | 5'- TCCGCAACCCGCATCTACAC -3'                                                     |
| <i>CgXpp1</i> -PTF3 | 5'- ACGATTCATGATGATTAGGCAG -3'                                                   |
| <i>CgXpp1</i> -PTR3 | 5'- GAATCCAACCTCCTCTACCTAA -3'                                                   |
| <i>CgXpp1</i> -RTF1 | 5'- ACAATGATGACAGCCTTGCCAG -3'                                                   |
| <i>CgXpp1</i> -RTR1 | 5'- CGCACTGTCGTCAACTATTTTCG -3'                                                  |
| <i>CgVeA</i> -RTF   | 5'- AGAGCCTGTGGTTCTGGTCCG -3'                                                    |
| <i>CgVeA</i> -RTR   | 5'- AAAAGTGATGTCCTTCTCCTGCG -3'                                                  |
| <i>CgLaeA</i> -RTF  | 5'- CCCTCCACAACCAGGAAACTC -3'                                                    |
| <i>CgLaeA</i> -RTR  | 5'- CGCAAGGAACCGTCATCACTAC -3'                                                   |

---

|                    |                                |
|--------------------|--------------------------------|
| <i>CgCheR</i> -RTF | 5'- GTCCGACTGCCTCTACACCACG -3' |
| <i>CgCheR</i> -RTR | 5'- CGATGAACTCGCTACCGCTGA -3'  |
| <i>actin</i> -F    | 5'-TCATCGACAATGGCTCCGGTATG-3'  |
| <i>actin</i> -R    | 5'-GCTCGTTGTAGAAGGTGTGATGC-3'  |
| RT- <i>brlA</i> -F | 5'- CGATGACCGTCCATACACC -3'    |
| RT- <i>brlA</i> -R | 5'- GCTGAGAGCGGCAGAAGG -3'     |
| RT-ER-F1           | 5'-GTCTTCACCTCGCCAAAGGGATC-3'  |
| RT-ER-R1           | 5'-ATGGTTAAACTAACGGGGCATAG-3'  |
| RT-FMO-F1          | 5'-CGGAAATGCCACGAAGACA-3'      |
| RT-FMO-R1          | 5'-GGACCAGATGATGGACGATG-3'     |
| RT-PKS-F1          | 5'-AGGTTCTCTCGCCATTGCT-3'      |
| RT-PKS-R1          | 5'-GGCATAGTGATACCTTGCGTTCT-3'  |
| RT-P450-F1         | 5'-CCAGGTTGGCAAACCTTGAA-3'     |
| RT-P450-R1         | 5'-CAGCCATTTGGTCCTCTATCG-3'    |
| <i>PCgER</i> -F    | 5'-GCTGAAGCGGAGGGAGATT-3'      |
| <i>PCgER</i> -R    | 5'-GCTGTGCCATCCACCGTAG-3'      |
| <i>PCgPKS</i> -F   | 5'-GGCTTGAATCCGCTGTTG-3'       |
| <i>PCgPKS</i> -R   | 5'-TGGAACCTAAAATGAGCG-3'       |
| <i>PCgP450</i> -F  | 5'-AGGCTAAGGTCTTGTTCG-3'       |
| <i>PCgP450</i> -R  | 5'-GGGAGTGGGGACTGGGTAA-3'      |
| <i>PCgLaeA</i> -F  | 5'-TTGAATCCGTTTCCTGGTCT-3'     |
| <i>PCgLaeA</i> -R  | 5'-TGCGTTTTTTTGCGGTTTTG-3'     |
| <i>PCgcheR</i> -F  | 5'-GTAGAATGGGGTTTAG-3'         |
| <i>PCgcheR</i> -R  | 5'-TCTTTAGACTCCTTACAT-3'       |
| <i>PCgFMO</i> -F   | 5'-CTGGTCTGCTGCGTTGTTG-3'      |
| <i>PCgFMO</i> -R   | 5'-GCCTTGGACTGCTTCGGGA-3'      |
| <i>PCgVeA</i> -F   | 5'-CTCTCCATCAACCAACCTTCATC-3'  |
| <i>PCgVeA</i> -R   | 5'-TGGTCTCTCTGGAGGTGATGGAA-3'  |
| <i>PblrA</i> -F    | 5'-GATTTGGTGCTTGGTACCTTTTCC-3' |
| <i>PblrA</i> -R    | 5'-AGAGGCAACAACCGAAGAGGAC-3'   |

---

**Table S2.** Metabolites identified that were differentially abundant between *C. globosum* W7 and *CgXppI*-N14 in the positive ion mode, based on fold  $P < 0.05$ .

| ID        | Metabolite identity                                | log2FC       | Pvalue      | VIP       | Trend | KEGG_pathway_annotation                                                                                                                                                                                          |
|-----------|----------------------------------------------------|--------------|-------------|-----------|-------|------------------------------------------------------------------------------------------------------------------------------------------------------------------------------------------------------------------|
| pos_10474 | Thymidine 5'-triphosphate                          | -11.13423386 | 0.000164179 | 1.5687651 | down  | Pyrimidine metabolism(ko00240)                                                                                                                                                                                   |
| pos_1060  | Gamma-Aminobutyric acid                            | -13.28867392 | 0.020709009 | 1.1940091 | down  | beta-Alanine metabolism(ko00410); Nicotinate and nicotinamide metabolism(ko00760); Alanine, aspartate and glutamate metabolism(ko00250); Butanoate metabolism(ko00650); Arginine and proline metabolism(ko00330) |
| pos_1101  | Leu Gly Gly                                        | -2.372294194 | 0.001852061 | 1.4361394 | down  | -                                                                                                                                                                                                                |
| pos_11024 | trans-delta2, cis-delta4-decadienoyl-CoA           | -10.72009982 | 0.020611046 | 1.1664208 | down  | -                                                                                                                                                                                                                |
| pos_11313 | N-Carbamoyl-2-amino-2-(4-hydroxyphenyl)acetic acid | 12.23586714  | 0.003395129 | 1.4284124 | up    | -                                                                                                                                                                                                                |
| pos_11334 | alpha-D-glucosamine 1-phosphate                    | 25.33760871  | 0.044794898 | 1.0805267 | up    | Amino sugar and nucleotide sugar metabolism (ko00520)                                                                                                                                                            |
| pos_11795 | Isoleucyl-Isoleucine                               | -14.99020964 | 0.000284469 | 1.5301012 | down  | -                                                                                                                                                                                                                |
| pos_13050 | Phytosphingosine 1-phosphate                       | 23.89639203  | 0.032245725 | 1.1418331 | up    | -                                                                                                                                                                                                                |
| pos_1329  | UDP-3-O-(3-hydroxymyristoyl)-N-acetylglucosamine   | -13.01163662 | 0.002382432 | 1.4609525 | down  | -                                                                                                                                                                                                                |

|           |                                            |              |             |           |      |                                                                                                                                                            |
|-----------|--------------------------------------------|--------------|-------------|-----------|------|------------------------------------------------------------------------------------------------------------------------------------------------------------|
| pos_1335  | 3-Oxodecanoyl-CoA                          | -13.48854942 | 0.011739871 | 1.2203372 | down | Fatty acid elongation(ko00062); Fatty acid degradation(ko00071); Fatty acid metabolism(ko01212)                                                            |
| pos_14147 | Arachidonoyl dopamine                      | -12.5842479  | 0.002325213 | 1.4494829 | down | -                                                                                                                                                          |
| pos_14294 | alpha-Linolenic acid                       | -5.597833544 | 0.000870852 | 1.5233314 | down | Biosynthesis of unsaturated fatty acids(ko01040); alpha-Linolenic acid metabolism(ko00592)                                                                 |
| pos_14357 | Stearic acid                               | -3.642417613 | 5.38E-05    | 1.5831907 | down | Biosynthesis of unsaturated fatty acids(ko01040); Fatty acid biosynthesis(ko00061)                                                                         |
| pos_14473 | PI(14:0/16:0)                              | -9.604069628 | 0.005109642 | 1.3879619 | down | -                                                                                                                                                          |
| pos_1471  | 4-Amino-5-hydroxymethyl-2-methylpyrimidine | -18.69520407 | 9.03E-05    | 1.6215664 | down | Thiamine metabolism(ko00730); ABC transporters(ko02010)                                                                                                    |
| pos_1488  | ADP-ribose                                 | -12.44685826 | 2.27E-06    | 1.6356617 | down | Purine metabolism(ko00230)                                                                                                                                 |
| pos_15001 | PS(19:0/17:0)                              | -11.14512763 | 0.003522672 | 1.370159  | down | -                                                                                                                                                          |
| pos_1523  | Syringaldehyde                             | 24.81833905  | 0.013341078 | 1.2919916 | up   | -                                                                                                                                                          |
| pos_1556  | D-erythro-Sphingosine-1-phosphate          | -16.43535231 | 0.001027893 | 1.5122714 | down | -                                                                                                                                                          |
| pos_15964 | PC(24:1(15Z)/16:1(9Z))                     | -7.114652883 | 0.029182533 | 1.1384104 | down | Linoleic acid metabolism(ko00591); alpha-Linolenic acid metabolism(ko00592); Glycerophospholipid metabolism(ko00564); Arachidonic acid metabolism(ko00590) |
| pos_16531 | PG(16:1(9Z)/16:0)                          | -26.98075002 | 0.022653833 | 1.1812559 | down | -                                                                                                                                                          |
| pos_1879  | Deoxyguanosine                             | -19.28554165 | 0.014286673 | 1.2713238 | down | Purine metabolism(ko00230)                                                                                                                                 |
| pos_19465 | PC(o-20:0/18:3(9Z,12Z,15Z))                | -7.957025211 | 2.94E-07    | 1.6471397 | down | -                                                                                                                                                          |

|          |                                   |              |             |           |      |                                                                                                                                                                                     |
|----------|-----------------------------------|--------------|-------------|-----------|------|-------------------------------------------------------------------------------------------------------------------------------------------------------------------------------------|
| pos_2059 | Peonidin 3-O-(coumaroylglucoside) | -16.42131168 | 0.000511938 | 1.5681512 | down | -                                                                                                                                                                                   |
| pos_3022 | Coenzyme Q10                      | 12.82687033  | 0.026239719 | 1.1993753 | up   | -                                                                                                                                                                                   |
| pos_3080 | Ornithine                         | -16.1337597  | 0.00373355  | 1.4325978 | down | D-Arginine and D-ornithine metabolism(ko00472)                                                                                                                                      |
| pos_3363 | Sphinganine 1-phosphate           | -8.054890942 | 0.00062717  | 1.5517242 | down | Sphingolipid metabolism(ko00600)                                                                                                                                                    |
| pos_5245 | isoleucine tetrazole              | -18.93729924 | 0.008559165 | 1.3320553 | down | -                                                                                                                                                                                   |
| pos_5995 | beta-D-Fructose 1,6-bisphosphate  | 18.29135865  | 0.038619056 | 1.0991089 | up   | Pentose phosphate pathway(ko00030); Biosynthesis of amino acids(ko01230); Fructose and mannose metabolism(ko00051); Carbon metabolism(ko01200); Glycolysis/Gluconeogenesis(ko00010) |
| pos_6261 | Diaminopimelic acid               | -7.275815377 | 0.000143543 | 1.585038  | down | Biosynthesis of amino acids(ko01230); Lysine biosynthesis(ko00300)                                                                                                                  |
| pos_6262 | Orotate                           | -13.90198905 | 0.002691629 | 1.4186936 | down | Pyrimidine metabolism(ko00240)                                                                                                                                                      |
| pos_66   | Triethanolamine                   | -7.101219122 | 4.10E-06    | 1.6027386 | down | Glycerophospholipid metabolism(ko00564)                                                                                                                                             |
| pos_7051 | 2-dehydro-D-gluconate             | 13.42904738  | 0.015717827 | 1.2782688 | up   | Pentose phosphate pathway(ko00030)                                                                                                                                                  |
| pos_711  | D-Ribulose 5-phosphate            | -1.664688671 | 0.007843919 | 1.309667  | down | Riboflavin metabolism(ko00740); Methane metabolism(ko00680); Biosynthesis of amino acids(ko01230);                                                                                  |
| pos_7325 | Dethiobiotin                      | -14.81363637 | 0.005477542 | 1.348116  | down | Biotin metabolism(ko00780)                                                                                                                                                          |

|           |                          |              |             |           |      |                                                                              |
|-----------|--------------------------|--------------|-------------|-----------|------|------------------------------------------------------------------------------|
| pos_743   | AICAR                    | -7.942117991 | 2.01E-05    | 1.5640045 | down | Purine metabolism(ko00230); Histidine metabolism(ko00340)                    |
| pos_8165  | Leucyl-Isoleucine        | -10.84923417 | 0.007264035 | 1.3007764 | down | -                                                                            |
| pos_9080  | dATP                     | -14.93449959 | 0.01024357  | 1.2656835 | down | Purine metabolism (ko00230)                                                  |
| pos_12491 | Kanzonol W               | 5.083316532  | 0.034980134 | 1.1479766 | up   | -                                                                            |
| pos_12483 | Isodictamnine            | 2.607669063  | 0.035526969 | 1.1417375 | up   | -                                                                            |
| pos_12623 | cephalexin               | 1.79147002   | 0.024021274 | 1.1908015 | up   | -                                                                            |
| pos_12981 | Pantetheine 4'-phosphate | 23.37940416  | 0.042838923 | 1.0923054 | up   | Carbapenem biosynthesis(ko00332); Pantothenate and CoA biosynthesis(ko00770) |
| pos_14315 | PS(19:0/18:1(11Z))       | -8.977154946 | 6.65E-05    | 1.6261843 | down | -                                                                            |
| pos_151   | Pyridoxamine             | -3.009979397 | 2.38E-06    | 1.6150199 | down | Vitamin B6 metabolism(ko00750)                                               |

**Table S3.** Metabolites identified that were differentially abundant between *C. globosum* W7 and *CgXppI*-N14 in the negative ion mode, based on fold  $P < 0.05$ .

| ID        | name                                                                         | log2FC       | Pvalue      | VIP         | Trend | KEGG                                                         |
|-----------|------------------------------------------------------------------------------|--------------|-------------|-------------|-------|--------------------------------------------------------------|
| neg_10062 | 3-dehydroquinate                                                             | -13.37343439 | 0.029913288 | 1.043651166 | down  | Biosynthesis of amino acids(ko01230)                         |
| neg_10071 | L-erythro-tetrahydrobiopterin                                                | -14.78238948 | 0.000108622 | 1.491899232 | down  | Folate biosynthesis(ko00790);<br>Metabolic pathways(ko01100) |
| neg_10088 | Alfuzosin                                                                    | 14.30754268  | 0.028879148 | 1.159931132 | up    | -                                                            |
| neg_10201 | Aclarubicin                                                                  | 17.23339309  | 0.02820355  | 1.176734898 | up    | -                                                            |
| neg_10296 | Tetrahydrobiopterin                                                          | -12.23798691 | 0.000241059 | 1.500244583 | down  | Metabolic pathways(ko01100); Folate<br>biosynthesis(ko00790) |
| neg_10329 | Fluconazole                                                                  | 10.84352267  | 0.034197768 | 1.134783737 | up    | -                                                            |
| neg_10447 | Ginkgolide J                                                                 | 14.97121802  | 0.021110074 | 1.153519273 | up    | -                                                            |
| neg_10469 | Pyrazinamide                                                                 | 21.26914237  | 0.029021777 | 1.109206374 | up    | -                                                            |
| neg_10556 | Ureidoisobutyric acid                                                        | 16.23865138  | 0.010266139 | 1.269250335 | up    | -                                                            |
| neg_10871 | ubiquinone-0                                                                 | -17.3003593  | 0.013301034 | 1.223316759 | down  | -                                                            |
| neg_11401 | 3-Carboxy-2,3,4,9-tetrahydro-<br>1H-pyrido[3,4-b]indole-1-<br>propanoic acid | -18.08313867 | 0.000447415 | 1.492440652 | down  | -                                                            |

|           |                            |              |             |             |      |                                                                             |
|-----------|----------------------------|--------------|-------------|-------------|------|-----------------------------------------------------------------------------|
| neg_11763 | Agmatine                   | -5.001250506 | 0.014493821 | 1.144251727 | down | Metabolic pathways(ko01100);<br>Arginine and proline<br>metabolism(ko00330) |
| neg_12543 | 2-aminogalactopyranose     | 16.71476365  | 0.024898431 | 1.181086051 | up   | -                                                                           |
| neg_12812 | His Gln Asn Glu            | -3.432330967 | 1.71E-06    | 1.54422876  | down | -                                                                           |
| neg_13574 | S-Adenosylmethionine       | -3.109457794 | 0.000514586 | 1.419061938 | down | Monobactam biosynthesis(ko00261);<br>Biosynthesis of amino acids(ko01230)   |
| neg_13615 | PS(14:1(9Z)/16:0)          | -6.508461852 | 0.010807343 | 1.199500777 | down | -                                                                           |
| neg_13729 | PG(16:0/18:1(11Z))         | -5.222676366 | 0.007158976 | 1.196056795 | down | -                                                                           |
| neg_13831 | Mefenamic acid             | -17.56825452 | 0.000278413 | 1.520582704 | down | -                                                                           |
| neg_13900 | hexadec-2-enoyl-CoA        | 13.53803964  | 0.028751036 | 1.107196147 | up   | -                                                                           |
| neg_14191 | Arginyl-Methionine         | -17.83834032 | 9.88E-06    | 1.57661586  | down | -                                                                           |
| neg_14221 | Thr Ile Ser Glu            | -11.48106467 | 0.001101947 | 1.433904779 | down | -                                                                           |
| neg_14261 | Tricosanoic acid           | -18.17157446 | 0.042085592 | 1.006254273 | down | -                                                                           |
| neg_1666  | Adenosine 3'-monophosphate | -0.916673661 | 0.032578306 | 1.043213254 | down | Purine metabolism(ko00230);<br>Metabolic pathways(ko01100)                  |
| neg_1845  | 2-Hydroxycinnamic acid     | -2.308390373 | 9.19E-05    | 1.509469961 | down | Phenylalanine metabolism(ko00360)                                           |



|          |                                   |              |             |             |      |                                                                    |
|----------|-----------------------------------|--------------|-------------|-------------|------|--------------------------------------------------------------------|
| neg_1850 | 7,8-dihydroneopterin 3'-phosphate | -2.848106012 | 4.12E-05    | 1.525257887 | down | Folate biosynthesis(ko00790)                                       |
| neg_1858 | Cyclic GMP                        | -1.193961723 | 0.003255237 | 1.317660351 | down | Purine metabolism(ko00230)                                         |
| neg_1869 | 3'-AMP                            | -2.875242595 | 1.45E-05    | 1.520874958 | down | Purine metabolism(ko00230)                                         |
| neg_1897 | Ascorbic acid                     | -11.0855945  | 0.024747492 | 1.116019191 | down | Glutathione metabolism(ko00480);<br>Ascorbate and aldarate         |
| neg_2004 | O-Phosphoethanolamine             | -2.689966496 | 7.58E-07    | 1.545758676 | down | Ubiquinone and other terpenoid-quinone biosynthesis(ko00130)       |
| neg_2351 | E-Linalool oxide                  | -10.02333077 | 0.004269877 | 1.345978622 | down | -                                                                  |
| neg_2531 | GMP-lysine                        | -11.81656003 | 0.000260553 | 1.415914991 | down | -                                                                  |
| neg_2532 | Histidiny-Cysteine                | -11.30134226 | 0.000135149 | 1.495158879 | down | -                                                                  |
| neg_2555 | Deoxyribose                       | -8.53068332  | 3.16E-06    | 1.537288418 | down | Pentose phosphate pathway(ko00030)                                 |
| neg_2558 | Arginyl-Tyrosine                  | -15.57281123 | 0.008506452 | 1.270447332 | down | -                                                                  |
| neg_2564 | Maltotriose                       | -14.44129146 | 0.001903019 | 1.408322775 | down | ABC transporters(ko02010)                                          |
| neg_2615 | Cytidine 5'-monophosphate (CMP)   | -18.35439445 | 0.003588193 | 1.364760025 | down | -                                                                  |
| neg_2676 | Octanoyl-CoA                      | -10.98153984 | 0.036984331 | 1.02188744  | down | Lipoic acid metabolism(ko00785);<br>Fatty acid metabolism(ko01212) |
| neg_2723 | Malvidin 3-O-(acetylglucoside)    | -11.68701603 | 0.009780569 | 1.254724788 | down | -                                                                  |

|          |                                       |              |             |             |      |                                                                     |
|----------|---------------------------------------|--------------|-------------|-------------|------|---------------------------------------------------------------------|
| neg_3822 | PS(19:0/16:0)                         | -10.59380226 | 0.001481527 | 1.422296958 | down | -                                                                   |
| neg_4169 | PI(16:1(9Z)/18:1(9Z))                 | -11.63209157 | 0.000614401 | 1.468455794 | down | -                                                                   |
| neg_4172 | PI(18:1(9Z)/18:1(9Z))                 | -14.23931772 | 0.000168119 | 1.520512911 | down | -                                                                   |
| neg_4354 | PG(16:0/19:0)                         | -9.489451811 | 0.026889955 | 1.148301973 | down | -                                                                   |
| neg_5458 | 4-acetamidobutanal                    | -11.20682122 | 0.000760727 | 1.460599905 | down | Arginine and proline<br>metabolism(ko00330);                        |
| neg_5553 | Anserine                              | -5.018091507 | 0.024437981 | 1.074309987 | down | Histidine metabolism(ko00340); beta-<br>Alanine metabolism(ko00410) |
| neg_6061 | Thr Ile Gln Asp                       | -6.159694054 | 0.00171791  | 1.298149322 | down | -                                                                   |
| neg_6611 | L-Fucose                              | -3.259300346 | 0.004296607 | 1.341780358 | down | Amino sugar and nucleotide sugar<br>metabolism(ko00520);            |
| neg_671  | O-Phosphorylethanolamine              | -1.393313702 | 0.000491963 | 1.3970652   | down | Sphingolipid metabolism(ko00600)                                    |
| neg_8304 | NMNH                                  | 20.93609062  | 0.015608154 | 1.267944225 | up   | Biosynthesis of secondary<br>metabolites(ko01110); Aflatoxin        |
| neg_9216 | Sterigmatocystin                      | 1.268193113  | 0.004874468 | 1.309134317 | up   | Biosynthesis of secondary<br>metabolites(ko01110); Aflatoxin        |
| neg_9342 | Manumycin A                           | 20.63651094  | 0.013054371 | 1.175089455 | up   | -                                                                   |
| neg_9385 | 3-(2,3-Dihydroxyphenyl)<br>propanoate | -12.52020538 | 0.009917368 | 1.272878889 | down | Phenylalanine metabolism(ko00360)                                   |
| neg_9452 | formycin B                            | 1.449119826  | 0.02684409  | 1.105033007 | up   | -                                                                   |

|          |             |              |             |             |      |                                                           |
|----------|-------------|--------------|-------------|-------------|------|-----------------------------------------------------------|
| neg_9703 | UDPglucose  | -10.66644655 | 0.003785958 | 1.245492312 | down | Pyrimidine metabolism(ko00240);<br>Ascorbate and aldarate |
| neg_9870 | Zafirlukast | 8.188162101  | 0.038520837 | 1.055172536 | up   | -                                                         |
